# Supplementary material for: Orphan GPR116 mediates the insulin sensitizing effects of the hepatokine FNDC4 in adipose tissue
Source: PubMed Central journal article supplement (PMC8137956; doi:10.1038/s41467-021-22579-1), 2021-05-20
Supplement: 41467_2021_22579_MOESM1_ESM.pdf [file 41467_2021_22579_MOESM1_ESM.pdf]

## Supplementary Information

### **Orphan GPR116 mediates the insulin sensitizing effects of the hepatokine FNDC4 in adipose tissue**

Georgiadi A. et al

*Correspondence to Anastasia Georgiadi (email: anastasia.georgiadi@helmholtz-muenchen.de)  
or Stephan Herzig (email : stephan.herzig@helmholtz-muenchen.de )*

### **Supplementary Note 1**

#### **FNDC4 ELISA - FNDC4 quantification in plasma or serum- ELISA Validation**

Quantification of circulating sFNDC4 was performed by a competitive ELISA against FNDC4, which is EK-067-90 from Phoenix Pharmaceuticals, according to the manufacturer's instructions. To verify the specificity of this ELISA we performed the following tests: a) we quantified secreted sFNDC4 from human hepatocyte cell media (HepG2) with siFNDC4 mediated deletion of endogenous FNDC4. HepG2 cells express high levels of FNDC4 (Ct value  $\approx$  24). First, we confirmed that HepG2 cells secrete sFNDC4 by transiently overexpressing FNDC4 carrying a FLAG tag at the N-terminal (FLAG NTF) (extracellular). We were able to detect FLAG tag in the media, confirming that sFNDC4 is secreted from HepG2 cells (Supplementary Fig.1a). Consistent with the idea that sFNDC4 is released after proteolytic cleavage of FNDC4, we observed a decrease in FLAG signal in the media of HepG2 FNDC4NTF overexpressing cells (Supplementary Fig.1a). Using siRNA against FNDC4 (siFNDC4) we achieved 85% deletion of FNDC4 in HepG2 cells (Supplementary Fig.1b-left panel) and we also measured a corresponding decreased of 76% on sFNDC4 in non-concentrated media using the FNDC4 ELISA (Supplementary Fig.1b-right panel). Furthermore, as shown in Fig.2 we also measured decreased circulating levels of sFNDC4 in mice with liver deletion of FNDC4 (AAVshFNDC4) compared to AAVshControl treated mice. Therefore, we conclude that this ELISA is specifically detecting sFNDC4.

To exclude cross reactivity with the sequence homologue FNDC5/Irisin, we spiked FcsFNDC4, native sFNDC4, FcIrisin and native Irisin in diluent at a final concentration of 80ng/ml and indeed we were able to measure the expected concentration of spiked protein only for rec. FcsFNDC4, sFNDC4, whereas rec.FcIrisin or native Irisin were not detectable (Supplementary Fig.1c). Thus, we confirmed no cross reactivity of this ELISA with Irisin.

In addition, we tested the impact of sample dilution (Supplementary Fig.1d) and matrix interference (Supplementary Fig.1e) on the accuracy of sFNDC4 measurements. In both tests, when absorbance values were within the linear part of the standard curve (Supplementary Fig.1f) we acquired measurements within the acceptable range for accuracy with regard the sample dilution effect (acceptable range: 70%-130%) and the matrix effects (80%-120%)<sup>1</sup>.

Of note we observed substantial differences between the quantified levels of sFNDC4 in plasma derived from mouse trunk and tail blood. sFNDC4 quantified from tail plasma was up to 10-fold lower to the levels from trunk blood derived plasma (Supplementary Fig.1g). Similar phenomenon has been previously observed for several cytokines<sup>2</sup>.

## Supplementary Note 2

Table of correspondence between nM and ng/ml for the doses of rec. FcsFNDC4 used in the manuscript and previous publications on native sFNDC4 functions.

| FcsFNDC4 |       | sFNDC4 |       | Fc    |       |
|----------|-------|--------|-------|-------|-------|
| nM       | ng/ml | nM     | ng/ml | nM    | ng/ml |
| 0,001    | 0,1   | 0,006  | 0,1   | 0,001 | 0,05  |
| 0,01     | 1     | 0,1    | 1     | 0,01  | 0,5   |
| 0,019    | 10    | 0,6    | 10    | 0,019 | 10    |
| 0,25     | 25    | 1,6    | 25    | 0,25  | 12,5  |
| 0,5      | 50    | 3,1    | 50    | 0,5   | 25    |
| 1        | 100   | 6,3    | 100   | 1     | 50    |
| 10       | 1000  | 62,5   | 1000  | 10    | 500   |
| 19       | 1900  | 200,0  | 1900  | 10    | 1900  |
| 28       | 2800  | 400,0  | 2800  | 10    | 2800  |
| 100      | 10000 | 625,0  | 10000 | 100   | 5000  |
| 200      | 20000 | 1250,0 | 20000 | 200   | 10000 |
| 400      | 40000 | 2500,0 | 40000 | 400   | 20000 |

FcsFNDC4 MW: 100000Da

Fc MW: 50000Da

sFNDC4 MW: 16000Da

### Reference list (Supplementary):

1. Andreasson, U. et al. A Practical Guide to Immunoassay Method Validation. *Front. Neurol.* 6, (2015)
2. Mella, J. R., Chiswick, E. L., King, E. & Remick, D. G. LOCATION, LOCATION: CYTOKINE CONCENTRATIONS ARE DEPENDENT ON BLOOD SAMPLING SITE. *Shock Augusta Ga* 42, 337–342 (2014).
3. Zimmermann, L. et al. A Completely Reimplemented MPI Bioinformatics Toolkit with a New HHpred Server at its Core. *J. Mol. Biol.* 430, 2237–2243 (2018)

## FNDC4 ELISA specificity test

### a Transient transfection in HepG2 cells

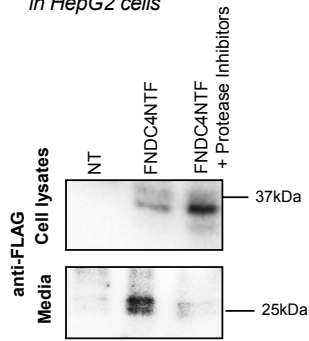

### b

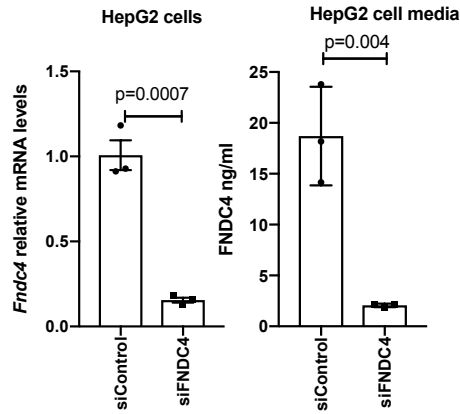

### c

### FNDC4 competitive ELISA - crossreactivity test

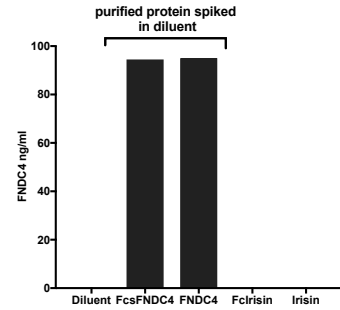

### d FNDC4 competitive ELISA - Parallelism Assay (effect of dilution on accuracy of measurements)

| mouse plasma | Dilution | OD values | Observed (Extrapolated)-Concentration ng/ml | Adjusted for dilution Concentration ng/ml | Accuracy (obs/exp)*100 % |
|--------------|----------|-----------|---------------------------------------------|-------------------------------------------|--------------------------|
| sample 1     | 1/20     | 0.8749    | 6.33 (exp.)                                 | 126.63                                    |                          |
|              | 1/80     | 1.8625    | 1.34 (obs.)                                 | 107.00                                    | 84.50                    |
|              | 1/100    | 2.0086    | 1.01 (obs.)                                 | 101.10                                    | 79.84                    |
| sample 2     | 1/20     | 0.6645    | 9.39 (exp.)                                 | 187.80                                    |                          |
|              | 1/80     | 1.5061    | 2.39 (obs.)                                 | 190.91                                    | 101.66                   |
|              | 1/100    | 1.7752    | 1.56 (obs.)                                 | 155.68                                    | 82.90                    |
| sample 3     | 1/20     | 1.216     | 3.69 (exp.)                                 | 73.70                                     |                          |
|              | 1/80     | 2.0786    | 0.87 (obs.)                                 | 69.58                                     | 94.41                    |
|              | 1/100    | 2.0378    | 0.95 (obs.)                                 | 95.10                                     | 129.03                   |

### e FNDC4 competitive ELISA - test for matrix effect ( spike/recovery test)

| mouse plasma              | Dilution | OD values | Observed (extrapolated) Concentration ng/ml | Adjusted for dilution Concentration (ng/ml)- Observed Concentration (ng/ml) | Expected concentrated in spiked sampd (ng/ml) = concentr. in neat + spiked concentr. | Accuracy % (obs/exp)*100 |
|---------------------------|----------|-----------|---------------------------------------------|-----------------------------------------------------------------------------|--------------------------------------------------------------------------------------|--------------------------|
| neat sample 1             | 1/20     | 0.6645    | 9.4                                         | 187.80                                                                      |                                                                                      |                          |
| sample 1- spiked 10ng/ml  | 1/20     | 0.644     | 9.8                                         | 196.21                                                                      | 197.80                                                                               | 99.197                   |
| sample 1- spiked 100ng/ml | 1/20     | 0.462     | 15.2                                        | 304.97                                                                      | 287.80                                                                               | 105.967                  |
| neat sample 2             | 1/80     | 2.079     | 0.9                                         | 69.58                                                                       |                                                                                      |                          |
| sample 2- spiked 10ng/ml  | 1/80     | 1.965     | 1.1                                         | 88.26                                                                       | 79.58                                                                                | 110.910                  |
| sample 2- spiked 100ng/ml | 1/80     | 1.740     | 1.7                                         | 132.05                                                                      | 169.58                                                                               | 77.868                   |
| neat sample 3             | 1/100    | 1.775     | 1.6                                         | 155.68                                                                      |                                                                                      |                          |
| sample 3- spiked 10ng/ml  | 1/100    | 1.715     | 1.7                                         | 172.18                                                                      | 165.68                                                                               | 103.925                  |
| sample 3- spiked 100ng/ml | 1/100    | 1.618     | 2.0                                         | 201.04                                                                      | 255.68                                                                               | 78.628                   |

### f

### FNDC4 competitive ELISA - typical standard curve

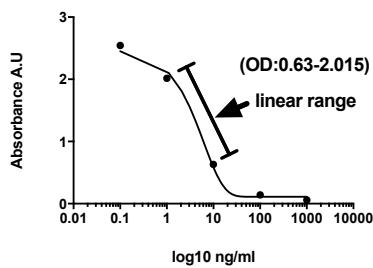

### g

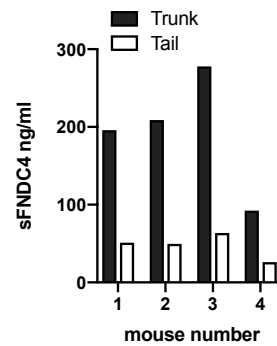

**Supplementary Fig.1 : Specificity and accuracy tests on FNDC4 competitive ELISA.** **a** Western blot against the FLAG tag on HepG2 human hepatocytes cell lysates and media (non concentrated). HepG2 cells were transiently transfected with N-terminal FLAG expressing FNDC4 plasmid (FNDC4 NTF) or lipofectamine control (NT) or with FNDC4 NTF and treated with protease inhibitors to prevent shedding of sFNDC4. This experiment has been performed once on HepG2 cells. **b** RT- quantification of the mRNA of FNDC4 (left panel) and ELISA quantification (right panel) of sFNDC4 in non concentrated media from HepG2 cells transfected with siRNA against FNDC4 (siFNDC4) or siRNA control (siControl). n=3 replicate wells of cells (left panel) and n=3 conditioned media from replicate wells (right panel). Data represent  $2^{-\Delta\Delta Ct}$  and *Tbp* is used as a housekeeping gene. **c** ELISA quantification of FNDC4 from left to right: in diluent only, diluent with spiked FcFNDC4 or FNDC4 (actual spiked amount 80 ng/ml) or FcIrisin or Irisin (actual spiked amount 80 ng/ml). n=1 ELISA well per condition representative of at least 2 experiments . **d** ELISA quantification of FNDC4 in 3 different mouse plasma samples diluted as indicated on the figure. Recovery is calculated based on the 1/20 dilution=expected concentration. **e** ELISA quantification of FNDC4 in 3 different mouse plasma samples, which were spiked with either 10 ng/ml FcFNDC4 or 100 ng/ml FcFNDC4 and quantified at indicated dilutions. **d,e** this validation analysis was performed once. n=3 representative mice are shown at the table results. **f** Standard curve of the FNDC4 ELISA used for the calculation of concentrations for **(d)** and **(e)**. The linear part of the curve is indicated by an arrow. **g** ELISA quantification of FNDC4 in plasma derived from trunk or tail blood of 4 different mice. Mice were 9-12 weeks old, C57BL6N, males. In **b** data are shown as mean  $\pm$  SEM, statistics represent unpaired two-tailed t test. Source data are provided as a Source Data file.

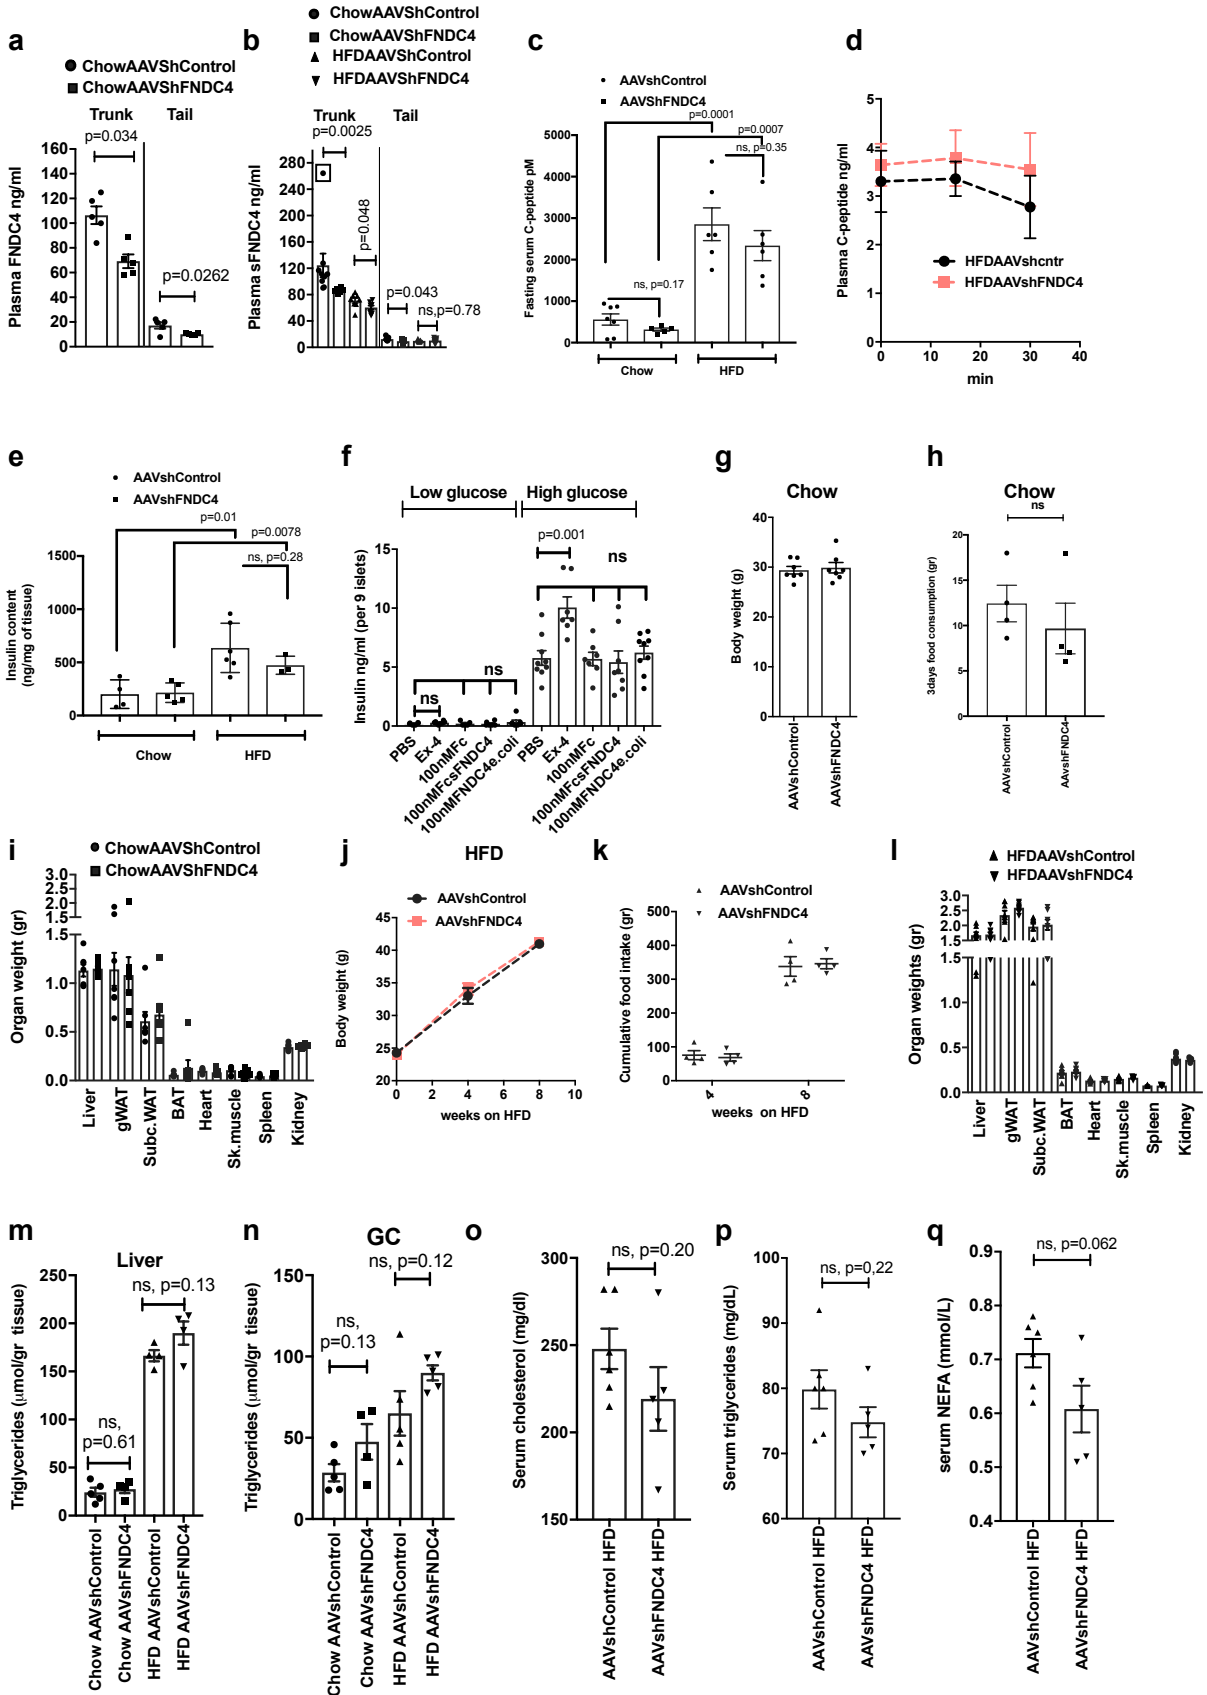

**Supplementary Fig.2 (related to Fig.2): Mice with hepatic deletion of FNDC4 exhibited decreased circulating levels of sFNDC4 and developed a prediabetes phenotype.** ELISA quantification of sFNDC4 in plasma from blood collected from trunk or tail of indicated groups at 3 weeks after AAVs injection (**a**) or 11 weeks after AAVs injections (**b**). The 'Trunk' measurements are also shown in Fig.2, but also included here for comparison purposes. In (**a**) n= 5 mice per group. In (**b**) n=9 mice for TrunkChowAAVshControl, TailChowAAVshControl, Tail HFDAAVshControl and TailHFDAAVshFNDC4, n= 6 mice for TrunkChowAAVshFNDC4, n=8 for TrunkHFDAAVshControl and TrunkHFDAAVshFNDC4, n=7 for Tail ChowAAVshFNDC4. **c** Fasting serum C-peptide (pM) in chow and HFD (8 weeks) fed mice. n=7 mice for ChowAAVshControl, n=5 for ChowAAVshFNDC4 and n= 6 mice for HFDAAVshControl and HFDAAVshFNDC4. **d** Plasma C-peptide (ng/ml) during an IPGTT in mice on HFD for 8 weeks. n=6 mice per group. **e** Insulin content of pancreatic tissue from AAVshFNDC4 and AAVshControl treated mice on chow and HFD for 8 weeks. n=4 mice for ChowAAVshControl, n=5 mice for ChowAAVshFNDC4, n=6 mice for HFDAAVshControl and n=3 mice for HFDAAVshFNDC4. **f** Glucose stimulated insulin secretion from isolated primary islets pre-treated for 24 h with the indicated treatments prior to glucose stimulation. Treatments: Exedin-4 (Ex-4)(a known stimulant of insulin secretion), FcsFNDC4 100 nM (produced in mammalian cells) and FNDC4 e.coli produced (100 nM) and Fc (produced in mammalian cells)100 nM (used as control for the FcsFNDC4 treatment). n=6 replicate wells of 9 mouse islets each, for PBS (low glucose) and 100nMFcsFNDC4 (low glucose), n= 8 replicate wells of 9 mouse islets each, for Ex-4 (low glucose), Ex-4 (high glucose) and 100nMFcsFNDC4(High glucose), n=5 replicate wells of 9 mouse islets each for 100nMFc (low glucose), n=9 replicate wells of 9 mouse islets each, for 100nMFNDNC4e.coli (low glucose), PBS(high glucose), 100nMFNDNC4e.coli (high glucose), n=7 replicate wells of 9 mouse islets each, for 100nMFc(high glucose). **g** Body weight (n=7 mice per group), **h** food intake, n=4 cages of 2 mice each, **i** organ weight of chow fed control mice (n=7 mice per organ, per group) and **j** body weight, n=8 mice for HFDAAVShControl, n=8 mice for HFDAAVshFNDC4, **k** food intake (n=4 cages of 4 mice each, per group), **l** organ weights for 8 weeks HFD fed mice (n=8 mice per organ, for HFDAAVshControl, n=7 mice per organ, for HFDAAVshFNDC4) . **m** Liver (n=5 mice for ChowAAVshControl, n=4 mice for ChowAAVshFNDC4, HFDAAVshControl, HFDAAVshFNDC4) and **n** skeletal muscle- gastrocnemius (GC) triglyceride content (n=5 mice

for ChowAAVshControl, HFDAAVshControl, HFDAAVshFNDC4 and n=4 mice for ChowAAVshFNDC4), **o** serum cholesterol, **p** serum triglycerides and **q** serum non-esterified fatty acids (NEFA) at indicated groups For **o,p,q** (n=6 mice for HFDAAVshControl and n=5 mice for HFDAAVshFNDC4). HFD is 45% fat. In all panels bars shown are mean  $\pm$  SEM. In **a,b,c,e,f,h, m-q** Statistics represent unpaired two-tailed t test. ns; non-significant. Source data are provided as a Source Data file.



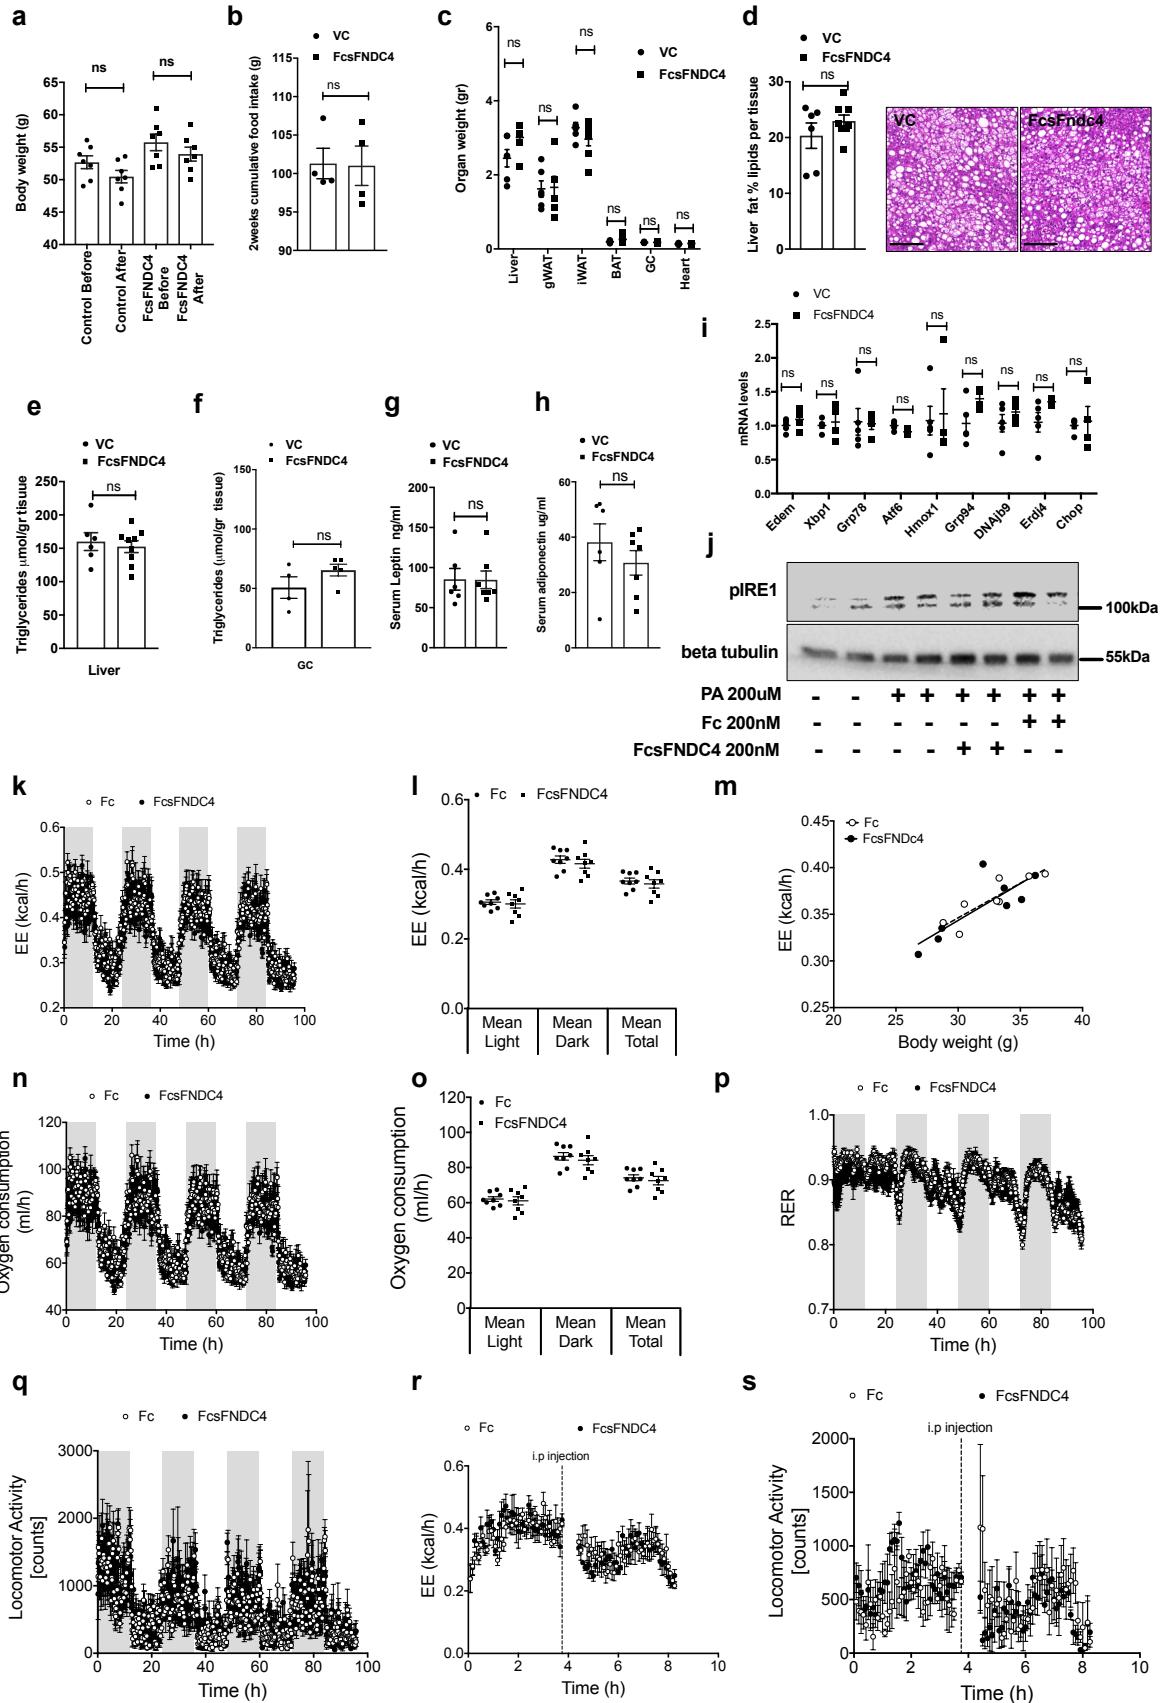

**Supplementary Fig.3 (related to Fig.3): Every second day injections of rec. FcsFNDC4 0.2 mg/kg improved glucose tolerance and increased glucose uptake in the white adipose tissue.**

**a** Body weight in grams before the start of injections and after 4 weeks of injections with FcsFNDC4 or vehicle control (VC). n=7 mice per group, per time point. **b** Cumulative food intake in grams for 2 weeks before the end of the study, n=4 cages, of 4 mice per cage, per group. **c** Organ weights at the end of the study, n=6 mice for VC and n=7 mice per group for FcsFNDC4. **d**-left panel: Quantification of % of lipid per total area of liver tissue observed by histology (n=6 mice for VC and n=8 mice for FcsFNDC4) and **d**-right panel: representative histology images out of 20 images per VC and FcFndc4 treated (4wks injections) HFD mice. HE. Bars = 200  $\mu$ m. Triglyceride content in **(e)** liver (n=6 mice for VC and n=9 mice for FcsFNDC4) and **(f)** GC (n=4 mice for VC and n=5 mice for FcsFNDC4), **g** ELISA quantification of serum leptin (ng/ml) (n=6 mice for VC and n=7 mice for FcsFNDC4) and **h** serum adiponectin ( $\mu$ g/ml) (n=6 mice for VC and n=7 mice for FcsFNDC4) in VC and FcsFNDC4 treated (4 wks injections) HFD mice. **i** RT-qPCR quantification of indicated genes in gWAT (gonadal WAT) of HFD mice treated with FcsFNDC4 or Fc control (4wks injections) (n=5 mice for VC and n=4 mice for FcsFNDC4). Data shown are  $2^{\Delta\Delta Ct}$  values and *Hprt* is used as a housekeeping gene. **j** WB of pIRE1 and beta tubulin loading control on 3T3L1 lysates treated Palmitate (PA) 200 $\mu$ M in the presence or absence of FcsFNDC4 (200nM) and Fc (200nM) control for 24hr. Representative experiment out of 2 experiments is shown. Uncropped blots are available in the SourceData file. **(k-s)** Metabolic phenotyping (TSE) of HFD mice (16 weeks on HFD 45% fat) injected for 4 weeks with FcsFNDC4 or Fc control (0,2 mg/kg): Energy expenditure **k** longitudinal, **l** mean, **m** in correlation to body weight. Oxygen consumption **n** longitudinal, **o** mean. **p** Respiratory exchange ratio (RER), **q** locomotor activity. **k-q** n=8 mice per group. **(r,s)** Metabolic phenotyping of chow fed, lean young mice (12-14 weeks old) 4h prior and 2h post single injection of Fc or FcsFNDC4, 1 mg/kg, under fasting conditions: **r** Energy expenditure (EE) and **s** locomotor activity. In **r, s** n=4 mice per group. Mice are C57BL6N males. Bars shown are mean  $\pm$  SEM. For **a-i** Statistics represent unpaired two-tailed t test. ns; non-significant. Source data are provided as a Source Data file.

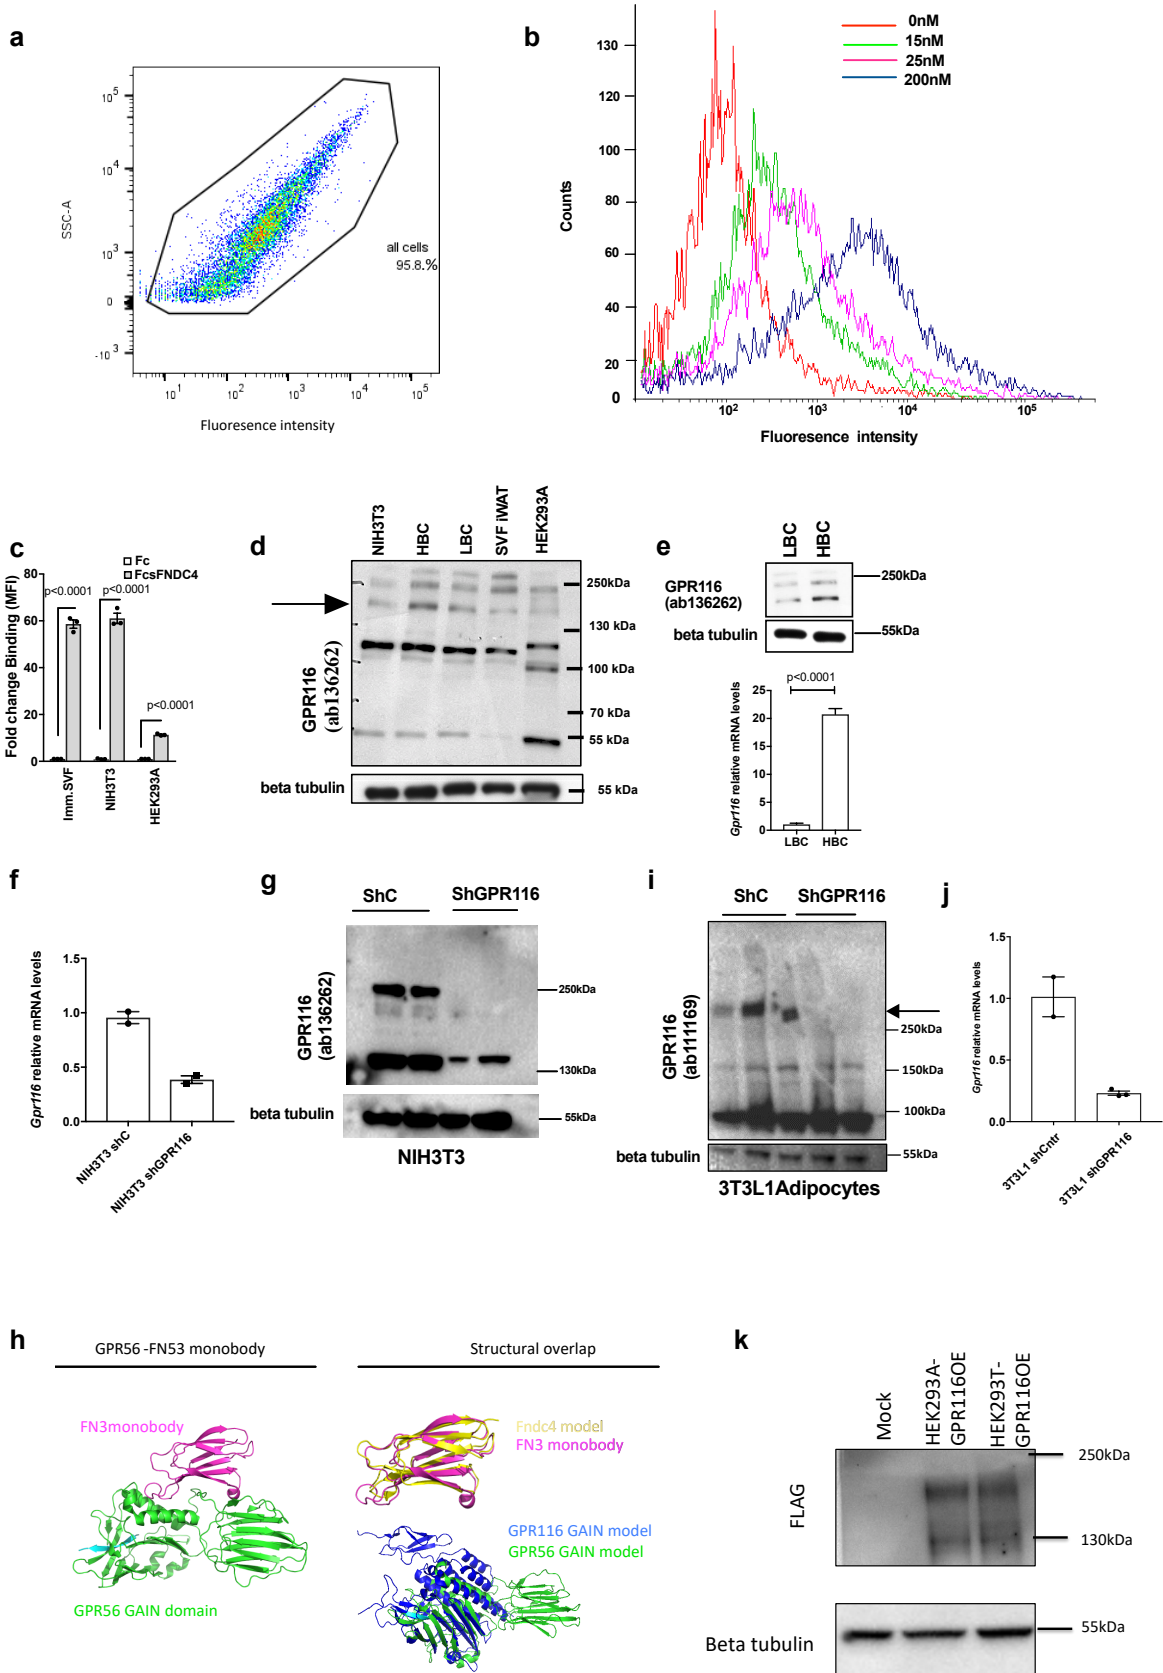

**Supplementary Fig.4 (related to Fig.4):** **a** Representative gating strategy for all FACS experiments presented in Figure 4-panels: **a,b,f,h,i,k,m,n**. The whole population of cells (approx. 95% of all cells) was selected. **b** Histogram: Typical shift in fluorescence, demonstrating increasing fluorescence intensity (FI), upon increasing binding of rec. Fc<sub>s</sub>FNDC4 on assessed cells (all cells-total population was selected at gating (see **a**)). **c** Binding (MFI) of Fc<sub>s</sub>FNDC4 and Fc proteins at 100 nM, to various cell lines. Values correspond to fold change of MFI (per 10000 cells/events) normalized to the MFI of Fc binding (Set at 1). n=3 replicate wells per group. This experiment was performed at least 3 times. **d** Western blot analysis of GPR116 protein at indicated cell types. Beta tubulin was used as a loading control. Arrow shows GPR116 band corresponding to the one identified by pull down in Fig.4j. This WB was performed once. **e** WB anti-GPR116 against endogenous GPR116 (top panel) and q-PCR measured *Gpr116* mRNA in HBC and LBC (bottom panel). This image was cropped and reversed from WB shown in **d** and it is repeated here for clarity. **f** q-PCR quantification of *Gpr116* mRNA in NIH3T3 preadipocytes (n=2 replicate wells of one experiment). **g** WB against GPR116 in total cells lysates of NIH3T3 preadipocytes. This experiment was performed once. **h** Interaction model of the GPR56-GAIN domain and FN3 monobody crystal structure, pdb 5KVM (<https://www.rcsb.org/structure/5KVM>). Predicted structural overlap of the FNDC4-FN3 domain and GPR116-GAIN domain with the corresponding GPR56-GAIN and FN3 monobody. Both FNDC4-FN3 and GPR116-GAIN domain models were originated based of the first hit of the HHpred<sup>3</sup> using the primary sequence of each protein. WB against GPR116 (**i**) and mRNA levels of GPR116 (**j**) in 3T3L1 mature adipocytes transduced with lentivirus shGPR116 (mouse) and shControl. n=2 for ShControl and n=3 for shGPR116 replicate of a representative experiment out of three experiments. **k** WB against FLAG on total cell lysates of HEK293A and HEK293T cells stably overexpressing human GPR116-Cterm.FLAG or mock control. This WB experiment was performed once. For **e** (bottom panel), **f**, **j** data shown are 2<sup>^-ddCt</sup> values and *Tbp* was used as a housekeeping gene. In **d**, **e**, **g** Anti-GPR116 used: ab136262. In **i**, **j** we used anti-GPR116 ab111169. Bars are mean ± SEM. For **c**, **e** (**bottom**) Statistics represent unpaired two tailed t test. Source data are provided as a Source Data file.

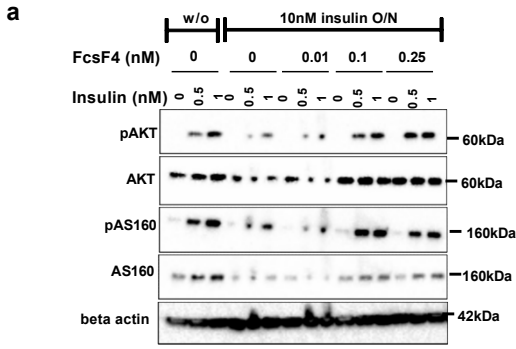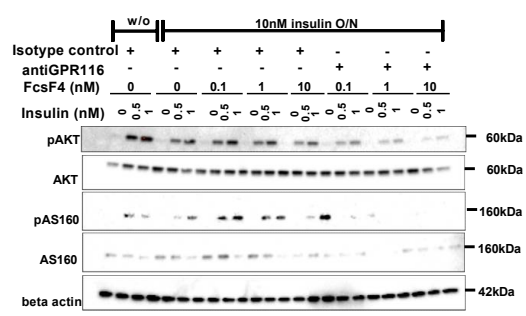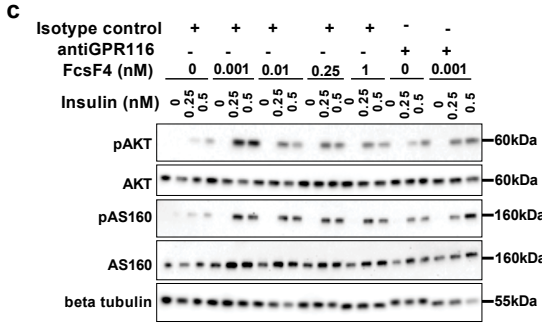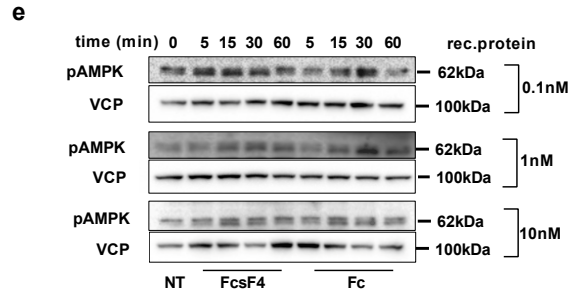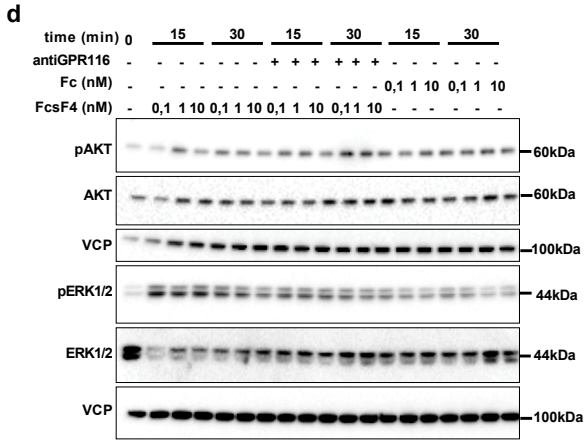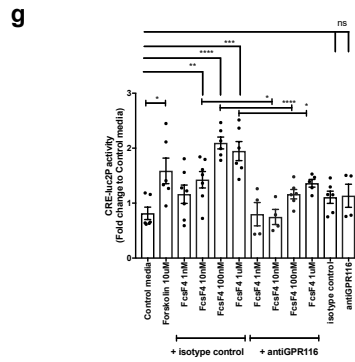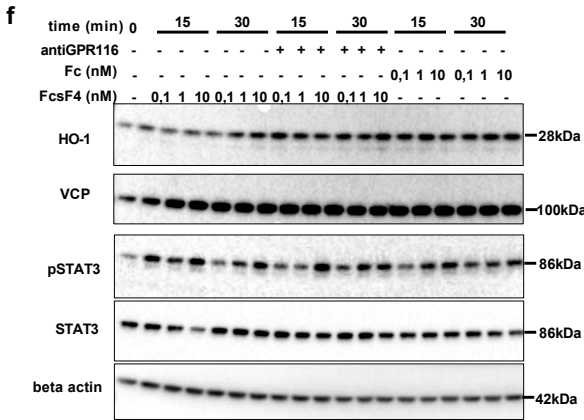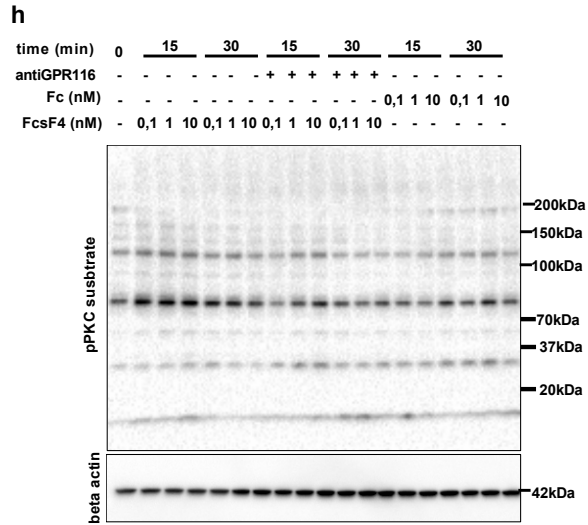

**Supplementary Fig.5 (related to Fig. 6): FNDC4-GPR116 interaction promotes insulin sensitivity in 3T3L1 (mature) adipocytes.** WB of indicated proteins (from total cell lysates) of 3T3L1 adipocytes treated with rec. FcsFDCN4 (FcsF4) at indicated concentrations and insulin 10nM O/N **(a)** in the absence or presence of 0,4ug/ml anti-GPR116 (ab111169) blocking antibody or 0,4ug/ml isotype control **(b)**. Cells were serum starved in DMEM high glucose for 3 h, followed by 5 minutes insulin stimulation at indicated concentrations. **a,b** are representative experiments out of at least two independent experiments. Experiments repeats are also shown in **Figure 6a,b**. **c** WB of indicated proteins (from total cell lysates) of 3T3L1 adipocytes treated 5min with insulin plus FcsFNDC4 at indicated concentrations, 3h after serum starvation. For indicated conditions, 30min before the insulin stimulation plus FcsFNDC4, 0.4ug/ml anti-GPR116 (ab111169) or isotype control were added to the cells. Representative results out of at least two independent experiments are shown. **d,f,h** WB of indicated proteins (from total cell lysates) of mouse primary SVF derived adipocytes. Adipocytes were serum starved for 3h prior the stimulation with FcsFNDC4 or Fc at indicated concentrations (in the absence of insulin) at indicated time points. For indicated conditions, 30min prior the stimulation with rec. protein the adipocytes were treated with 0,4ug/ml anti-GPR116 (ab111169). **e** WB of indicated proteins (from total cell lysates) of SVF derived mouse adipocytes treated at indicated time points with rec. protein Fc or FcsFNDC4 (0,1nM, 1nM, 10nM). At **d,e,f,h** representative results out of two independent experiments are shown. **g** Stimulation (3-4h) of 3T3L1 adipocytes CRE-luciferase reporter stable cells lines with indicated concentrations of rec. protein or Forskolin. For indicated conditions antiGPR116 (ab111169) 0.4ug/ml was added 30 min prior the addition of the rec. proteins. Data point represent replicate wells per condition. This experiment was performed once under the exact same conditions. Four independent experimental repeats of all conditions except of the FcsF4 1uM are shown in Figure 6e. At **g** Statistics represent unpaired two tailed t test and exact p values are for the comparison control-Forskolin p=0.0136, Control-FcsF410nM p=0.0089, Control – FcsF4100nM p<0.0001, Control-FcsF41uM p=0.0003. FcsF410uM isotype control-FcsF410nMantiGpr116 p=0.014, FcsF4100nM isotype control –FcsF4 10nM antiGPR116 p<0.0001, FcsF41uM isotype control- FcsF41uM antiGPR116 p=0.017. Phospho-antibodies :pAKT<sup>Ser473</sup>, pAMPK<sup>Thr172</sup>, pSTA3<sup>Y705</sup>, pCREB<sup>Ser133</sup>. Source data are provided as a Source Data file.

a (quantification of WB Fig.6a)

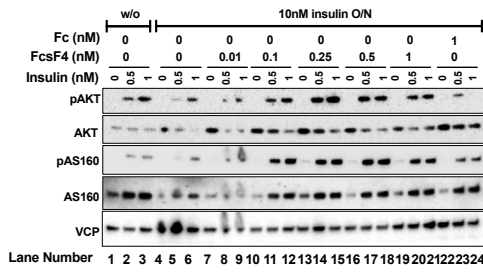

|    | pAKT   | AKT     | pAS160 | AS160  | VCP     |
|----|--------|---------|--------|--------|---------|
| 1  | 0      | 185270  | 0      | 330777 | 510096  |
| 2  | 68890  | 209850  | 88380  | 645507 | 370212  |
| 3  | 146090 | 190350  | 119110 | 730935 | 533628  |
| 4  | 0      | 477440  | 0      | 114165 | 964032  |
| 5  | 0      | 249630  | 0      | 213030 | 1869204 |
| 6  | 73520  | 88000   | 164380 | 197604 | 946632  |
| 7  | 0      | 794660  | 0      | 119178 | 490248  |
| 8  | 0      | 140210  | 95640  | 97146  | 272797  |
| 9  | 57070  | 148680  | 253130 | 127575 | 244878  |
| 10 | 0      | 708760  | 0      | 82818  | 327872  |
| 11 | 96710  | 495900  | 344930 | 301716 | 372010  |
| 12 | 142890 | 269790  | 548660 | 442404 | 459774  |
| 13 | 0      | 936520  | 69860  | 224910 | 491660  |
| 14 | 217350 | 543360  | 460530 | 564588 | 683224  |
| 15 | 371160 | 315850  | 532150 | 472572 | 387268  |
| 16 | 0      | 625830  | 58220  | 92259  | 465790  |
| 17 | 204570 | 323700  | 566940 | 408771 | 411968  |
| 18 | 175690 | 254030  | 634260 | 485712 | 383552  |
| 19 | 0      | 455640  | 72300  | 155448 | 526224  |
| 20 | 125540 | 290280  | 384890 | 455274 | 639840  |
| 21 | 137210 | 405150  | 390620 | 528183 | 916096  |
| 22 | 0      | 1069870 | 0      | 123372 | 693336  |
| 23 | 55260  | 635650  | 240420 | 485478 | 656820  |
| 24 | 0      | 557840  | 231390 | 533682 | 539232  |

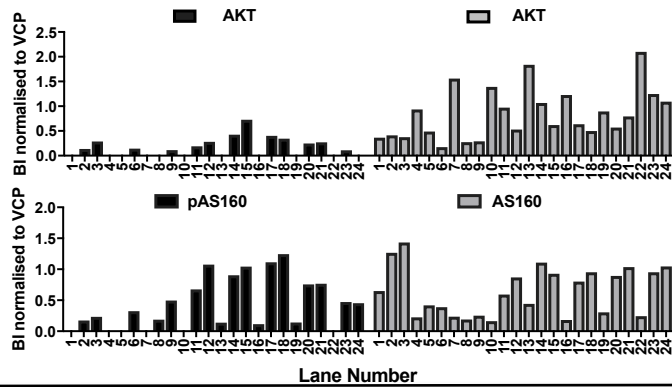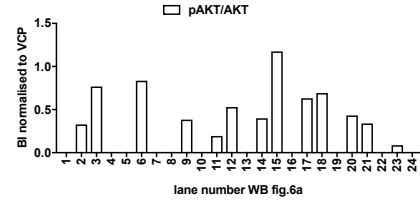

b (quantification of WB Fig.6b)

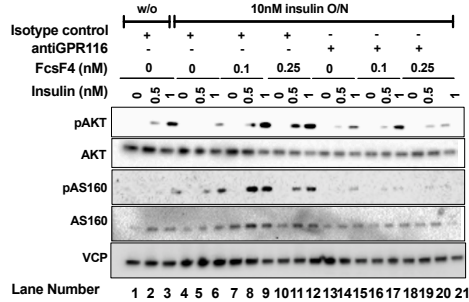

|    | pAKT   | AKT     | pAS160 | AS160  | VCP     |
|----|--------|---------|--------|--------|---------|
| 1  | 0      | 1167133 | 0      | 94959  | 1181850 |
| 2  | 299688 | 1466740 | 0      | 279792 | 1262268 |
| 3  | 579320 | 809379  | 0      | 309429 | 1161090 |
| 4  | 0      | 1107900 | 0      | 158328 | 1571823 |
| 5  | 0      | 786438  | 57340  | 165087 | 1758879 |
| 6  | 305872 | 724239  | 0      | 257832 | 1804311 |
| 7  | 0      | 1190709 | 30770  | 497214 | 1647621 |
| 8  | 401296 | 893250  | 59940  | 661968 | 1351638 |
| 9  | 914312 | 411831  | 0      | 455373 | 855180  |
| 10 | 0      | 493335  | 192360 | 243198 | 985086  |
| 11 | 505464 | 411867  | 135320 | 528750 | 1066518 |
| 12 | 870952 | 235386  | 0      | 502920 | 1530450 |
| 13 | 0      | 365463  | 43180  | 211284 | 1749456 |
| 14 | 176528 | 363726  | 79400  | 328428 | 1162305 |
| 15 | 378552 | 289710  | 0      | 312390 | 925632  |
| 16 | 0      | 339183  | 21080  | 450234 | 929898  |
| 17 | 195560 | 346689  | 0      | 170568 | 1053540 |
| 18 | 517216 | 343440  | 0      | 224910 | 994086  |
| 19 | 0      | 582057  | 17390  | 194418 | 1097847 |
| 20 | 256128 | 497475  | 0      | 212571 | 1013643 |
| 21 | 281632 | 266013  | 43330  | 0      | 729972  |

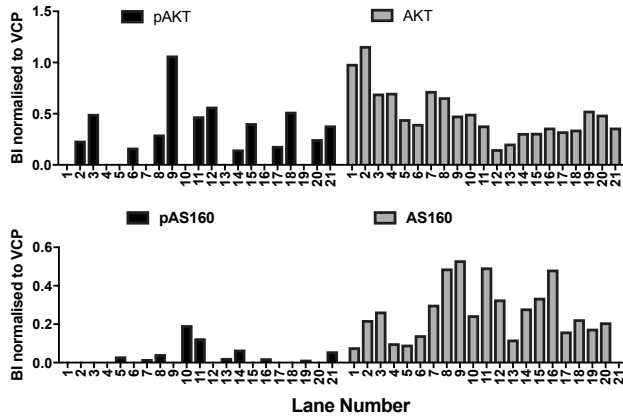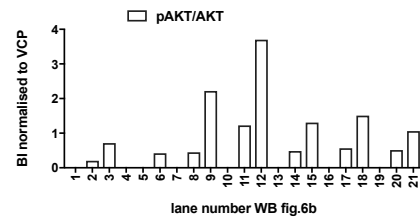

**Supplementary Fig. 6 (related to Fig. 6) :** Quantification of WB shown in Fig. 6. Image Lab was used to calculate band intensities (BI).



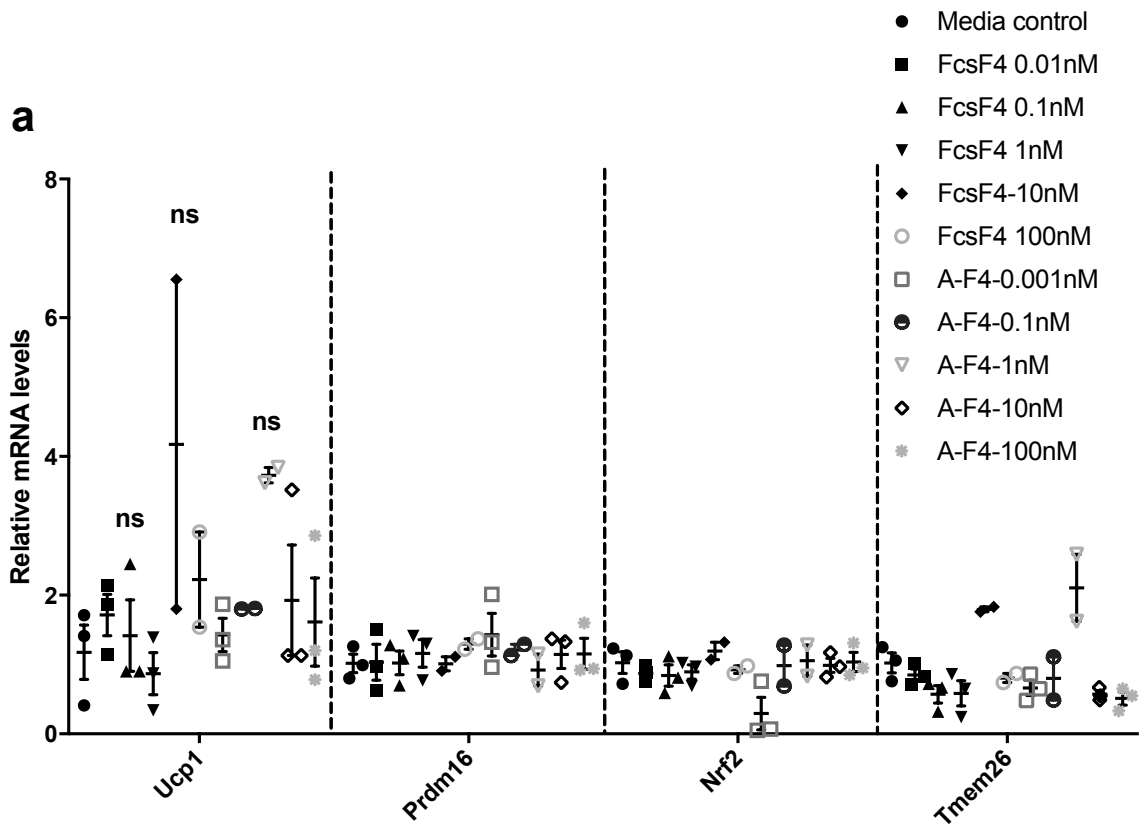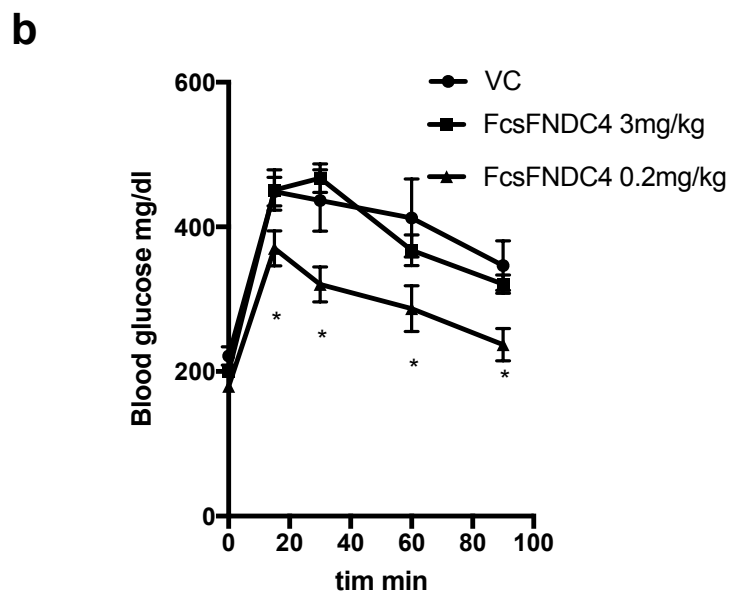

**Supplementary Fig. 7 (related to data mentioned at the Discussion) . a** Mouse primary SVF derived matured adipocytes treated 24h with different concentrations of mammalian FcsFNDC4

(used in this paper) or e.coli derived native sFNDC4 from Adipogen. Indicated browning and mitochondrial genes were quantified by q-PCR. mRNA levels represent  $2^{\Delta\Delta Ct}$  values relative to the control media. This experiment was performed at least 3 two times ( higher concentration 100nM were repeated only in independent experiments). n= 2-3 replicate wells of a representative experiment. This exact experiment with all presented concentrations of rec. protein assessed in parallel was performed only once. **b** Blood glucose levels during an IPGTT challenge on HFD (60% fat) mice, which had been injected for 4 weeks with VC (vehicle control), FcsFNDC4 3mg/kg or FcsFNDC4 0,2mg/kg (every second day injections). n=6 mice per group. In **b** Statistics represent unpaired two tailed t test comparing VC and FcsFNDC4 0.2mg/kg and \* indicates  $p < 0.05$  for indicated time points during the IPGTT. Source data are provided as a Source Data file.

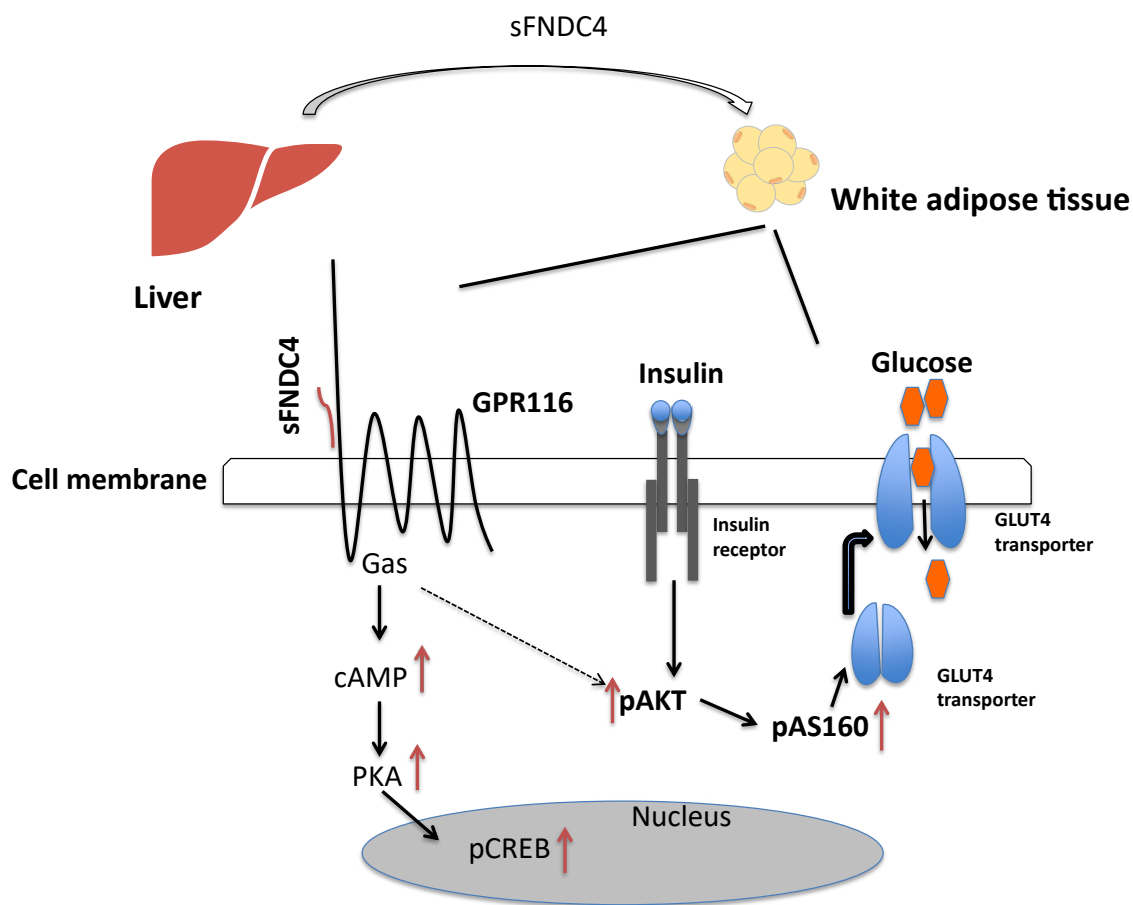

**Supplementary Fig.8:** Model of the endocrine effects of the hepatokine sFNDC4. sFNDC4 circulating levels are regulated by the liver. sFNDC4 is secreted by the liver and enhances insulin signaling in the WAT via binding to the GPR116. Binding of sFNDC4 to GPR116 stimulates Gs-cAMP- PKA signaling which leads to phosphorylation to pCREB. These events prime insulin receptor signaling and upon insulin stimulation crosstalk with the pAKT-pAS160-GLUT4 pathway to promote glucose uptake in WAT. Abbreviations: GPR116, G-protein coupled receptor 116, sFNDC4, soluble Fibronectin Type III Domain Containing 4, GLUT4 Glucose transporter type 4, pCREB, phospho cAMP-response element-binding protein, cAMP, Cyclic adenosine monophosphate. PKA, protein kinase A, pAKT, phospho protein kinase B. Thick black arrow lines indicate signaling events which were elucidated experimentally in the present manuscript. Black dashed arrow line indicates a crosstalk or interaction, which can be

inferred from the data presented in the present manuscript, but still requires further experimental validation. Red upwards arrow thick lines indicate upregulation.

**Supplementary Tables:**

For Supplementary Table 1 and Table 2, Source data are provided as a Source Data file.

Supplementary Table 1 (related to Figure 1): Human cross sectional cohort Leipzig. Table of mean and SEM values of study groups

|                | Age (yrs)          |       | BMI (kg/m <sup>2</sup> ) |         | WHR    |         | Body fat (%) |        | FPG (mmol/l) |         | FPI (pmol/l) |       | 2 h OGTT (mmol/l) |       | Clamp GIR (μmol/kg/min) |       | HbA1c (%) |       | Total Cholesterol (mg/dl) |       | HDL-Cholesterol (mg/dl) |       | LDL-Cholesterol (mg/dl) |       | TG (mg/dl) |       | FFA (mmol/l) |       |
|----------------|--------------------|-------|--------------------------|---------|--------|---------|--------------|--------|--------------|---------|--------------|-------|-------------------|-------|-------------------------|-------|-----------|-------|---------------------------|-------|-------------------------|-------|-------------------------|-------|------------|-------|--------------|-------|
| Lean-ND        | Number of values   | 12    | 12                       | 12      | 12     | 12      | 12           | 12     | 12           | 12      | 12           | 12    | 12                | 12    | 12                      | 12    | 12        | 12    | 12                        | 12    | 12                      | 12    | 12                      | 12    | 12         | 12    | 12           | 12    |
|                | Mean               | 64.33 | 24.53                    | 0.8925  | 22.43  | 5.26    | 16.78        | 5.971  | 101.2        | 5.275   | 171.4        | 53.56 | 106.1             | 79.93 | 10.23                   | 10.24 | 10.24     | 10.24 | 10.24                     | 10.24 | 10.24                   | 10.24 | 10.24                   | 10.24 | 10.24      | 10.24 | 10.24        | 10.24 |
|                | Std. Error of Mean | 4.51  | 0.257                    | 0.02097 | 0.5371 | 0.09957 | 3.463        | 0.1982 | 3.289        | 0.05094 | 7.172        | 4.298 | 10.23             | 10.24 | 10.24                   | 10.24 | 10.24     | 10.24 | 10.24                     | 10.24 | 10.24                   | 10.24 | 10.24                   | 10.24 | 10.24      | 10.24 | 10.24        | 10.24 |
| Obese-I/GT/ITT | Number of values   | 28    | 28                       | 28      | 28     | 28      | 28           | 28     | 28           | 28      | 28           | 28    | 28                | 28    | 28                      | 28    | 28        | 28    | 28                        | 28    | 28                      | 28    | 28                      | 28    | 28         | 28    | 28           | 28    |
|                | Mean               | 79.04 | 34.2                     | 1.063   | 36.73  | 5.246   | 126.1        | 6.105  | 59           | 5.593   | 195.6        | 51.84 | 106               | 159.3 | 5.522                   | 5.522 | 5.522     | 5.522 | 5.522                     | 5.522 | 5.522                   | 5.522 | 5.522                   | 5.522 | 5.522      | 5.522 | 5.522        |       |
|                | Std. Error of Mean | 4.17  | 1.11                     | 0.0268  | 1.526  | 0.09411 | 15.26        | 0.1461 | 4.522        | 0.04598 | 5.624        | 1.961 | 5.158             | 10.6  | 10.6                    | 10.6  | 10.6      | 10.6  | 10.6                      | 10.6  | 10.6                    | 10.6  | 10.6                    | 10.6  | 10.6       | 10.6  | 10.6         |       |
| Obese-T2D      | Number of values   | 10    | 10                       | 10      | 10     | 10      | 10           | 3      | 10           | 10      | 10           | 10    | 10                | 10    | 10                      | 10    | 10        | 10    | 10                        | 10    | 10                      | 10    | 10                      | 10    | 10         | 10    | 10           |       |
|                | Mean               | 69    | 34.62                    | 1.048   | 33.81  | 6.281   | 318.8        | 13.73  | 30.8         | 6.04    | 228.8        | 52.5  | 135.9             | 218.2 | 7.183                   | 7.183 | 7.183     | 7.183 | 7.183                     | 7.183 | 7.183                   | 7.183 | 7.183                   | 7.183 | 7.183      | 7.183 | 7.183        |       |
|                | Std. Error of Mean | 4.712 | 1.584                    | 0.03323 | 2.772  | 0.2263  | 39.7         | 1.426  | 6.178        | 0.1688  | 7.183        | 1.905 | 7.149             | 12.34 | 12.34                   | 12.34 | 12.34     | 12.34 | 12.34                     | 12.34 | 12.34                   | 12.34 | 12.34                   | 12.34 | 12.34      | 12.34 | 12.34        |       |
|                | p<0.05             | a     | a,b                      | a,b     | a,b    | a,b,c   | a,b,c        | b,c    | a,b,c        | a,b,c   | a,b,c        | a,b,c | a,b,c             | a,b,c | a,b,c                   | a,b,c | a,b,c     | a,b,c | a,b,c                     | a,b,c | a,b,c                   | a,b,c | a,b,c                   | a,b,c | a,b,c      | a,b,c | a,b,c        |       |

Lean-ND:Lean- no diabetes, Obese-I/GT/ITT: impaired glucose tolerance/ impaired insulin tolerance , Obese-T2D: Obese type 2 diabetes  
 Comparisons: a LeanND-Obese-I/GT/ITT, b LeanND-Obese-I/GT/ITT, c Obese-I/GT/ITT-Obese-T2D  
 yrs:Years, BMI: Body mass index, WHR: waist to hip ratio, FPG: fasting plasma glucose, FPI: fasting plasma insulin, HbA1c: Hemoglobin A1c, HDL:High density lipoprotein, LDL: Low density lipoprotein, TG: triglycerides, FFA: free fatty acids







**Supplementary Table 3: List of all used primer sequences**

m: mouse, h: human

| Gene name | TaqMan probe ID | Species |
|-----------|-----------------|---------|
| hFNDC4    | Hs01100278_g1   | human   |
| hGPR116   | Hs00391810_m1   | human   |
| 18S rRNA  | Hs99999901_s1   | human   |

| Gene name       | 5' to 3' primer sequence   | Species |
|-----------------|----------------------------|---------|
| mGpr116-F       | GAT CGC GTG GCG GAA GAA TA | mouse   |
| mGpr116-R       | GTC CCT CGA ATT GGA AAA    | mouse   |
| hGPR116-F       | AGACAGGTTATGGGTGGCCT       | human   |
| hGPR116-R       | TCCAAGTCGGCTTGTAGGAC       | human   |
| hRXFP1-F        | TATGGCACC AATGGAGTATGCT    | human   |
| hRXFP1-R        | ACTATGATGATAAATCGGCCAA     | human   |
| mTbp-F          | GAGCCAAGAGTGAAGAACAGTC     | mouse   |
| mTbp-R          | GCTCCCCACCATATTCTGAATCT    | mouse   |
| hTBP-F          | CCACTCACAGACTCTCACAAAC     | human   |
| hTBP-R          | CTGCGGTACAATCCAGAACT       | human   |
| mFndc4-F        | ACCTCCCTCTCCTGTGAATGT      | mouse   |
| mFndc4-R        | ATGGAGTAGCCAATGACGATG      | mouse   |
| mHprt -F        | AGTCCAGCGTCGTGATTAG        | mouse   |
| mHprt-R         | TTTCCAAATCTCGGCATAATGA     | mouse   |
| mBeta actin - F | GTGACGTTGACATCCGTAAGA      | mouse   |
| mBeta actin -R  | GCCGGACTCATCGTACTCC        | mouse   |
| mIL6-F          | CACGCAGACTTCATCCTCCACA     | mouse   |
| mIL6-R          | AGCTATAGTCCATCCGTGCCTG     | mouse   |
| mIL1b-F         | CAAGCAATACCCAAAGAAGA       | mouse   |
| mIL1b-R         | GAAACAGTCCAGCCCATAC        | mouse   |
| mMcp1-F         | GCCTGCTTTCACAGTTG          | mouse   |
| mMcp1-R         | CATCTTGCTGGTGAATGAGTA      | mouse   |
| mCd206-F        | AAATGGTCAGAGGCACAGTTC      | mouse   |
| mCd206-R        | GGAGGCTGGCTGTGATAAATG      | mouse   |
| mIL10-F         | GGAGCAGGTGAAGAGTGATT       | mouse   |
| mIL10-R         | AGCTCTGTCTAGGTCCTGGA       | mouse   |
| mCcl24-F        | AATCCAGAAAACCGAGTG         | mouse   |
| mCcl24-R        | TCCAGTTTTGTATGTGCC         | mouse   |
| mCcl11-F        | GAAAGTCCCAACACACTACTG      | mouse   |
| mCcl11-R        | GATCTTTTGCCCAACCTG         | mouse   |
| mCd68-F         | TGTCTGATCTTGCTAGGACCG      | mouse   |
| mCd68-R         | GAGAGTAACGGCCTTTTGTGA      | mouse   |
| mTNFalpha-F     | CCACCAGCTCTTCTGTCTAC       | mouse   |
| mTNFalpha-R     | GGTCTGGCCATAGAAGTACTGAT    | mouse   |
| mResistin-F     | AAGAACCCTTCATTTCCCTCCT     | mouse   |
| mResistin-R     | GTCCAGCAATTTAAGCCAATGTT    | mouse   |
| mH3f3-F         | TGTGGCCCTCCGTGAAATC        | mouse   |
| mH3f3-R         | GGCATAATTGTTACACGTTGGC     | mouse   |
| mEdem-F         | AGTCAAATGTGGATATGCTACGC    | mouse   |
| mEdem-R         | ACAGATATGATATGGCCCTCAGT    | mouse   |
| mXbp-1-F        | GACAGAGAGTCAAACCTAACGTGG   | mouse   |
| mXbp1-R         | GTCCAGCAGGCAAGAAGGT        | mouse   |
| mAtf6-F         | GTCCAAAGCCGAAAGAGCTGTCTG   | mouse   |
| mAtf6-R         | AGAGATGCCTCCTCTGATTGCG     | mouse   |
| mHmox-1-F       | AGGTCAGGTGTCAGAGAA         | mouse   |
| mHmox-1-R       | CTTCAGGGCCGTGATAGATA       | mouse   |
| mDNAjb9-F       | ATAAAAGCCCTGATGCTGAAGC     | mouse   |
| mDNAjb9-R       | GCCATTGGTAAAGCACTGTGT      | mouse   |
| mGrp78-F        | TGTCTTCTCAGCATCAAGCAAGG    | mouse   |
| mGrp78-R        | CCAACACTTCCTGGACAGGCTT     | mouse   |
| mGrp94-F        | CTCACAGAGCCTGTGGATGA       | mouse   |
| mGrp94-R        | TCTCTGTGCTTCCCGACTT        | mouse   |
| mERdj4-F        | CTCCACAGTCAGTTTTCGTCTT     | mouse   |
| mERdj4-R        | GGCCTTTTGTATTGTGCGCTC      | mouse   |
| mChop-F         | CTGGAAGCCTGGTATGAGGAT      | mouse   |
| mChop-R         | CAGGGTCAAGAGTAGTGAAGGT     | mouse   |

| Genotyping primers | 5' to 3' primer sequence  | Species |
|--------------------|---------------------------|---------|
| GPR116-F           | GGAGGCTCTGTGCGTTTT        | mouse   |
| GPR116-R1          | CTGTGGACATGATGAAGGGTG     | mouse   |
| GPR116-R2          | CTCCCTGAATCATAGTCTAGTCTCC | mouse   |
| Cre-1              | GAACTGATGGACATGTTCAAG     | mouse   |
| Cre-2              | AGTGCCTTCCGACCTAGAGCCTGT  | mouse   |
| Cre-3              | TTACGTCCATCGTGGACAGC      | mouse   |
| Cre-4              | TGGGCTGGGTGTTAGCCTTA      | mouse   |
